# Supplementary material for: Risk of Sperm Disorders and Impaired Fertility in Frozen–Thawed Bull Semen: A Genome-Wide Association Study
Source: MDPI journal article supplement (doi:10.3390/ani14020251), 2024-01-13
Supplement: s1 [file s1]

**Supplementary Table S4.** Genomic associations with post-cryopreservation sperm tail and neck abnormalities with regard to previously unknown candidate genes.

| SNP                    | BTA <sup>1</sup> | SNP position (bp) | <i>p</i> -value | Alleles | SNP location          | Candidate genes <sup>2</sup>                                               |
|------------------------|------------------|-------------------|-----------------|---------|-----------------------|----------------------------------------------------------------------------|
| ARS-BFGL-NGS-113327    | 18               | 12,295,233        | 3.50E-20        | C/T     | intergenic variant    | <i>ENSBTAG00000054270</i> (113.9 Kb)                                       |
| BOVINEHD2400014613     | 24               | 51,876,107        | 3.50E-20        | C/T     | intergenic variant    | <i>ENSBTAG00000051721</i> (105 Kb),<br><i>ENSBTAG00000049503</i> (54.6 Kb) |
| BTB-01402723           | 10               | 94,482,815        | 3.50E-20        | A/G     | intron variant        | <i>ENSBTAG00000050021</i>                                                  |
| HAPMAP39869-BTA-78346  | 10               | 14,327,969        | 3.50E-20        | T/C     | upstream gene variant | <i>C10H15orf61</i>                                                         |
| HAPMAP41900-BTA-54636  | 22               | 46,309,192        | 3.50E-20        | C/T     | intergenic variant    | <i>ENSBTAG00000049764</i> (47.7 Kb)                                        |
| HAPMAP39377-BTA-113470 | 21               | 36,623,599        | 4.84E-07        | A/C     | intergenic variant    | <i>ENSBTAG00000054263</i> (66.2 Kb)                                        |
| ARS-BFGL-NGS-107194    | 3                | 110,642,401       | 6.88E-07        | T/C     | intergenic variant    | <i>C3H1orf216</i> (8.2 Kb)                                                 |
| HAPMAP40994-BTA-46361  | 19               | 61,630,610        | 9.56E-07        | T/C     | intergenic variant    | <i>ENSBTAG00000049077</i> (34.1 Kb)                                        |
| BTA-74596-NO-RS        | 5                | 96,166,308        | 1.11E-06        | G/A     | intergenic variant    | <i>ENSBTAG00000051346</i> (93.4 Kb)                                        |
| HAPMAP48384-BTA-54234  | 22               | 35,354,500        | 1.44E-06        | G/A     | intergenic variant    | <i>ENSBTAG00000051801</i> (17.7 Kb)                                        |
| BTA-61502-NO-RS        | 26               | 38,585,670        | 4.52E-06        | G/A     | intergenic variant    | <i>ENSBTAG00000049634</i> (199.2 Kb)                                       |
| BTA-35174-NO-RS        | 14               | 63,917,588        | 8.14E-06        | A/G     | intergenic variant    | <i>ENSBTAG00000052148</i> (58.7 Kb)                                        |
| ARS-BFGL-NGS-18962     | 1                | 130,517,998       | 8.15E-06        | T/C     | synonymous variant    | <i>ENSBTAG00000051936</i>                                                  |
| ARS-BFGL-NGS-73903     | 23               | 49,725,139        | 8.19E-06        | A/G     | intergenic variant    | <i>ENSBTAG000000513166</i> (115.3 Kb), <i>ENSBTAG00000052017</i>           |

<sup>1</sup> BTA, *Bos taurus* chromosome. <sup>2</sup> Distance from a significant SNP to the respective gene is given in parentheses.
