# Supplementary material for: Risk of Sperm Disorders and Impaired Fertility in Frozen–Thawed Bull Semen: A Genome-Wide Association Study
Source: MDPI journal article supplement (doi:10.3390/ani14020251), 2024-01-13
Supplement: s1 [file s1]

**Supplementary Table S3.** Genomic associations with post-cryopreservation sperm tail and neck abnormalities with regard to previously known candidate genes.

| SNP                        | BTA <sup>1</sup> | SNP position (bp) | <i>p</i> -value | Alleles | SNP location             | Candidate genes <sup>2</sup>                                                                                  |
|----------------------------|------------------|-------------------|-----------------|---------|--------------------------|---------------------------------------------------------------------------------------------------------------|
| ARS-BFGL-NGS-113327        | 18               | 12,295,233        | 3.50E-20        | C/T     | intergenic variant       | <i>FOXF1</i> (84.6 Kb)                                                                                        |
| ARS-BFGL-NGS-116330        | 2                | 131,016,477       | 3.50E-20        | A/G     | intergenic variant       | <i>ZBTB40</i> (76.4 Kb),<br><i>WNT4</i> (28.6 Kb)                                                             |
| ARS-BFGL-NGS-83728         | 11               | 94,227,167        | 3.50E-20        | C/T     | intron variant           | <i>RABGAP1</i>                                                                                                |
| ARS-BFGL-NGS-98094         | 2                | 47,782,292        | 3.50E-20        | C/T     | intergenic variant       | <i>EPC2</i> (132.3 Kb),<br><i>MBD5</i> (18.4 Kb)                                                              |
| ARS-BFGL-NGS-98828         | 9                | 20,117,983        | 3.50E-20        | C/T     | intergenic variant       | <i>TTK</i> (42.3 Kb),<br><i>BCKDHB</i> (12.3 Kb)                                                              |
| BOVINEHD0600006887         | 6                | 25,017,431        | 3.50E-20        | G/T     | intron variant           | <i>PPP3CA</i>                                                                                                 |
| BOVINEHD1000004800         | 10               | 14,392,278        | 3.50E-20        | A/G     | intron variant           | <i>MAP2K5</i>                                                                                                 |
| BOVINEHD1500025946         | 15               | 65,145,149        | 3.50E-20        | G/A     | synonymous<br>variant    | <i>CD59</i>                                                                                                   |
| BTA-73210-NO-RS            | 5                | 29,544,481        | 3.50E-20        | G/A     | intron variant           | <i>DIP2B</i>                                                                                                  |
| BTB-00401428               | 9                | 81,924,104        | 3.50E-20        | A/G     | intergenic variant       | <i>AIG1</i> (90 Kb),<br><i>ADAT2</i> (16.4 Kb)                                                                |
| BTB-00671456               | 17               | 11,751,720        | 3.50E-20        | T/G     | 3' UTR variant           | <i>TTC29</i> , <i>POU4F2</i> (71<br>Kb)                                                                       |
| BTB-01435781               | 17               | 11,466,582        | 3.50E-20        | C/T     | intergenic variant       | <i>TTC29</i> (13.6 Kb)                                                                                        |
| BTB-01560502               | 1                | 5,880,498         | 3.50E-20        | G/A     | intron variant           | <i>GRIK1</i>                                                                                                  |
| HAPMAP38976-BTA-<br>71247  | 10               | 54,582,753        | 3.50E-20        | G/T     | intron variant           | <i>NEDD4</i><br>( <i>esv4011968</i> )                                                                         |
| HAPMAP39869-BTA-<br>78346  | 10               | 14,327,969        | 3.50E-20        | T/C     | upstream gene<br>variant | <i>C10H15orf61</i>                                                                                            |
| HAPMAP41900-BTA-<br>54636  | 22               | 46,309,192        | 3.50E-20        | C/T     | intergenic variant       | <i>WNT5A</i> (195.1 Kb)                                                                                       |
| HAPMAP45875-BTA-<br>37931  | 10               | 80,331,159        | 3.50E-20        | A/T     | intron variant           | <i>RAD51B</i>                                                                                                 |
| HAPMAP52726-<br>RS29018162 | 12               | 44,326,840        | 3.50E-20        | G/T     | intron variant           | <i>KLHL1</i>                                                                                                  |
| HAPMAP54751-<br>RS29013947 | 6                | 19,307,772        | 3.50E-20        | C/T     | intergenic variant       | <i>DKK2</i> (73.7 Kb)                                                                                         |
| BTB-00403297               | 9                | 91,346,194        | 1.67E-07        | A/C     | intron variant           | <i>RGS17</i>                                                                                                  |
| HAPMAP44674-BTA-<br>84638  | 9                | 91,158,204        | 1.67E-07        | G/T     | intron variant           | <i>RGS17</i>                                                                                                  |
| BTA-122302-NO-RS           | 23               | 48,444,673        | 3.34E-07        | T/G     | intergenic variant       | <i>LY86</i> (11.6 Kb),<br><i>F13A1</i> (186.9 Kb)<br><i>CLSPN</i> (10.9 Kb),<br><i>C3H1orf216</i> (8.2<br>Kb) |
| ARS-BFGL-NGS-107194        | 3                | 110,642,401       | 6.88E-07        | T/C     | intergenic variant       | <i>PTPRQ</i>                                                                                                  |
| BTB-00222372               | 5                | 10,278,129        | 7.95E-07        | C/T     | intron variant           | <i>SLC2A10</i> (96.2 Kb),<br><i>U6</i> (16.4 Kb)                                                              |
| BTB-00894494               | 13               | 76,201,517        | 7.95E-07        | A/C     | intergenic variant       | <i>ORC4</i>                                                                                                   |
| ARS-BFGL-NGS-114697        | 2                | 48,356,704        | 9.56E-07        | G/A     | intron variant           |                                                                                                               |
| HAPMAP40994-BTA-<br>46361  | 19               | 61,630,610        | 9.56E-07        | T/C     | intergenic variant       | <i>MAP2K6</i> (78.4 Kb)                                                                                       |
| BTA-74596-NO-RS            | 5                | 96,166,308        | 1.11E-06        | G/A     | intergenic variant       | <i>ATF7IP</i> (25.1 Kb)                                                                                       |
| BTB-00389188               | 9                | 35,109,955        | 1.11E-06        | C/T     | intron variant           | <i>FRK</i>                                                                                                    |
| BTB-00880226               | 4                | 89,299,743        | 1.11E-06        | G/A     | intergenic variant       | <i>TMEM229A</i> (62.8<br>Kb)                                                                                  |

|                        |    |             |          |       |                    |                                                  |
|------------------------|----|-------------|----------|-------|--------------------|--------------------------------------------------|
| ARS-BFGL-NGS-104332    | 7  | 26,829,547  | 1.33E-06 | A/G   | intron variant     | <i>FBN2</i>                                      |
| ARS-BFGL-NGS-46105     | 9  | 90,247,980  | 1.39E-06 | A/T   | intron variant     | <i>ESR1</i>                                      |
| BTA-107369-NO-RS       | 8  | 101,683,774 | 1.39E-06 | A/G   | intron variant     | <i>SVEP1</i>                                     |
| ARS-BFGL-BAC-6557      | 1  | 1,234,172   | 1.44E-06 | C/A   | 3' UTR variant     | <i>SON</i>                                       |
| ARS-BFGL-NGS-108850    | 26 | 42,896,381  | 1.44E-06 | CTG/- | intergenic variant | <i>SPADH2</i> (9.5 Kb),<br><i>SPADH1</i> (17 Kb) |
| ARS-BFGL-BAC-12931     | 1  | 1,288,510   | 1.51E-06 | A/G   | intron variant     | <i>GART</i>                                      |
| ARS-BFGL-NGS-19833     | 4  | 113,416,523 | 2.37E-06 | T/C   | intergenic variant | <i>KRBA1</i> (20.4 Kb),<br><i>SSPO</i> (8.8 Kb)  |
| HAPMAP24713-BTA-61641  | 26 | 42,033,314  | 3.33E-06 | A/G   | intergenic variant | <i>FGFR2</i> (102.3 Kb),<br><i>ATE1</i> (7.5 Kb) |
| ARS-BFGL-NGS-20623     | 26 | 43,687,318  | 4.52E-06 | T/C   | intergenic variant | <i>GPR26</i> (63.4 Kb)                           |
| ARS-BFGL-NGS-48262     | 26 | 33,191,302  | 4.52E-06 | C/G   | intron variant     | <i>ACSL5</i>                                     |
| BTA-61502-NO-RS        | 26 | 38,585,670  | 4.52E-06 | G/A   | intergenic variant | <i>RAB11FIP2</i> (27.3 Kb)                       |
| ARS-BFGL-NGS-96337     | 10 | 80,223,217  | 5.15E-06 | C/A   | intron variant     | <i>ZFYVE26</i>                                   |
| HAPMAP42436-BTA-114985 | 24 | 25,895,037  | 6.27E-06 | T/C   | intergenic variant | <i>TTR</i> (30.7 Kb),<br><i>DSG2</i> (19.1 Kb)   |
| BTA-35174-NO-RS        | 14 | 63917588    | 8.14E-06 | A/G   | intergenic variant | <i>KLF10</i> (34.8 Kb)                           |
| BTA-50305-NO-RS        | 1  | 127568464   | 8.15E-06 | G/A   | intron variant     | <i>ATR</i>                                       |
| HAPMAP52436-RS29009653 | 6  | 99732094    | 8.15E-06 | G/T   | intron variant     | <i>PLAC8A-202</i>                                |
| BOVINEHD0200036990     | 2  | 127435919   | 8.19E-06 | T/C   | intron variant     | <i>CEP85</i>                                     |
| BTB-01632102           | 9  | 32171013    | 9.78E-06 | T/C   | intron variant     | <i>MAN1A1</i>                                    |

<sup>1</sup> BTA, *Bos taurus* chromosome. <sup>2</sup> Distance from a significant SNP to the respective gene is given in parentheses.
