# Supplementary material for: Risk of Sperm Disorders and Impaired Fertility in Frozen–Thawed Bull Semen: A Genome-Wide Association Study
Source: MDPI journal article supplement (doi:10.3390/ani14020251), 2024-01-13
Supplement: s1 [file s1]

**Supplementary Table S2.** Genomic associations with post-cryopreservation sperm head abnormalities with regard to previously unknown candidate genes.

| Disorders            | SNP                    | BTA <sup>1</sup> | SNP position (bp) | p-value  | Alleles | SNP location          | Candidate genes <sup>2</sup>                                              |
|----------------------|------------------------|------------------|-------------------|----------|---------|-----------------------|---------------------------------------------------------------------------|
| Absence of acrosomes | BTA-96609-NO-RS        | 2                | 76,035,542        | 1.38E-05 | C/T     | intergenic variant    | <i>ENSBTAT00000074814.1</i>                                               |
|                      | BTB-00349550           | 8                | 57,559,835        | 6.08E-06 | G/A     | intergenic variant    | <i>ENSBTAG00000006294</i> (69.6 Kb)                                       |
|                      | ARS-BFGL-NGS-62112     | 9                | 103,671,451       | 2.89E-15 | G/T     | intergenic variant    | <i>ENSBTAG00000052029</i> (87.3 Kb)                                       |
|                      | BTB-00395187           | 9                | 59,571,491        | 2.89E-15 | C/T     | intron variant        | <i>ENSBTAG00000049952</i>                                                 |
|                      | BTB-00395273           | 9                | 59,595,970        | 2.89E-15 | G/A     | intron variant        | <i>ENSBTAG00000049952</i>                                                 |
|                      | ARS-BFGL-NGS-91628     | 12               | 49,371,159        | 5.20E-06 | C/T     | intergenic variant    | <i>ENSBTAG00000054652</i> (15.7 Kb)                                       |
|                      | ARS-BFGL-NGS-100023    | 15               | 1,242,901         | 2.89E-15 | A/G     | intergenic variant    | <i>ENSBTAG00000055028</i> (66.8 Kb).<br><i>ENSBTAG00000046387</i> (60 Kb) |
|                      | BTA-21339-NO-RS        | 19               | 47,200,732        | 5.20E-06 | C/T     | intron variant        | <i>ENSBTAG00000055001</i>                                                 |
|                      | BOVINEHD200019839      | 20               | 68,361,188        | 1.08E-05 | G/T     | intergenic variant    | <i>ENSBTAG00000045462</i> (48.4 Kb)                                       |
|                      | ARS-BFGL-BAC-28344     | 23               | 4,359,518         | 1.09E-06 | A/G     | intergenic variant    | <i>ENSBTAG00000046193</i> (177.4 Kb)                                      |
|                      | HAPMAP40994-BTA-46361  | 19               | 61,630,610        | 5.50E-06 | T/C     | intergenic variant    | <i>ENSBTAG00000049077</i> (34.1 Kb)                                       |
| Sperm head disorders | ARS-BFGL-NGS-113327    | 18               | 12,295,233        | 5.88E-06 | C/T     | intergenic variant    | <i>ENSBTAG00000054270</i> (114.6 Kb)                                      |
|                      | ARS-BFGL-NGS-57214     | 8                | 7,032,385         | 5.88E-06 | A/G     | intergenic variant    | <i>ENSBTAG00000053818</i>                                                 |
|                      | BTB-01402723           | 10               | 94,482,815        | 5.88E-06 | A/T     | intron variant        | <i>ENSBTAG00000050021</i>                                                 |
|                      | HAPMAP39869-BTA-78346  | 10               | 14,327,969        | 5.88E-06 | T/C     | upstream gene variant | <i>C10H15orf61</i>                                                        |
|                      | HAPMAP41900-BTA-54636  | 22               | 46,309,192        | 5.88E-06 | C/T     | intergenic variant    | <i>ENSBTAG00000049764</i> (47.7 Kb)                                       |
|                      | HAPMAP44656-BTA-67751  | 3                | 45,405,468        | 1.07E-05 | C/T     | intergenic variant    | <i>bta-mir-137</i> (38.2 Kb)                                              |
| Swollen acrosomes    | HAPMAP23010-BTA-142347 | 4                | 76,657,995        | 1.76E-07 | T/G     | intergenic variant    | <i>bta-mir-2420</i> (51.8 Kb)                                             |
| Wrinkled acrosomes   |                        |                  |                   |          |         |                       |                                                                           |

<sup>1</sup> BTA, *Bos taurus* chromosome. <sup>2</sup> Distance from a significant SNP to the respective gene is given in parentheses.
