# Supplementary material for: Risk of Sperm Disorders and Impaired Fertility in Frozen–Thawed Bull Semen: A Genome-Wide Association Study
Source: MDPI journal article supplement (doi:10.3390/ani14020251), 2024-01-13
Supplement: s1 [file s1]

**Supplementary Table S1.** Genomic associations with post-cryopreservation sperm head abnormalities with regard to previously known candidate genes.

| Disorders            | SNP                    | BTA <sup>1</sup> | SNP position (bp) | <i>p</i> -value | Alleles | SNP location            | Candidate genes <sup>2</sup>                        |
|----------------------|------------------------|------------------|-------------------|-----------------|---------|-------------------------|-----------------------------------------------------|
| Absence of acrosomes | BOVINEHD0400018765     | 4                | 68,273,671        | 2.17E-06        | T/G     | intergenic variant      | <i>CREBP5</i> (70.9 Kb),<br><i>JAZF1</i> (171.2 Kb) |
|                      | BTB-00566744           | 4                | 82,386,574        | 2.89E-15        | C/T     | intron variant          | <i>POU6F2</i>                                       |
|                      | HAPMAP39674-BTA-65901  | 4                | 86,144,034        | 2.89E-15        | A/C     | intergenic variant      | <i>TSPAN12</i> (32.9 Kb)                            |
|                      | HAPMAP42094-BTA-119925 | 4                | 82,923,306        | 2.89E-15        | T/C     | intergenic variant      | <i>VPS41</i> (26.6 Kb),<br><i>AMPH</i> (111.9 Kb)   |
|                      | ARS-BFGL-NGS-62112     | 9                | 103,671,451       | 2.89E-15        | G/T     | intergenic variant      | <i>AFDN</i> (141.9 Kb)                              |
|                      | ARS-BFGL-NGS-37893     | 11               | 72,476,622        | 2.89E-15        | A/G     | upstream gene variant   | <i>TCF23</i> (2.7 Kb),<br><i>ABHD1</i> (14.3 Kb)    |
|                      | ARS-BFGL-BAC-14362     | 12               | 67,348,260        | 1.14E-05        | T/C     | intergenic variant      | <i>GPC5</i> (7.5 Kb)                                |
|                      | BOVINEHD1100020331     | 11               | 70,961,745        | 2.89E-15        | A/G     | 3' UTR variant          | <i>SPDYA</i> (9.5 Kb),<br><i>PPP1CB</i>             |
|                      | BTA-42058-NO-RS        | 17               | 9,807,701         | 2.89E-15        | C/T     | intron variant          | <i>NR3C2</i>                                        |
|                      | HAPMAP41533-BTA-40976  | 17               | 45,029,111        | 2.89E-15        | C/T     | downstream gene variant | <i>ZNF26</i> (3.4 Kb),<br><i>ZNF84</i> (9.5 Kb)     |
|                      | BOVINEHD2000019839     | 20               | 68,361,188        | 1.08E-05        | G/T     | intergenic variant      | <i>U6</i> (55.9 Kb)                                 |
|                      | ARS-BFGL-BAC-28344     | 23               | 4,359,518         | 1.09E-06        | A/G     | intergenic variant      | <i>BMP5</i> (30 Kb)                                 |
|                      | HAPMAP51003-BTA-58716  | 24               | 57,482,936        | 2.89E-15        | C/T     | intron variant          | <i>ATP8B1</i>                                       |
|                      | ARS-BFGL-NGS-106493    | 27               | 27,915,371        | 2.89E-15        | C/T     | intergenic variant      | <i>NRG1</i> (61.4 Kb)                               |
|                      | ARS-BFGL-NGS-19057     | 29               | 44,196,154        | 1.94E-05        | C/T     | downstream gene variant | <i>CDC42EP2</i> (2 Kb),<br><i>DPF2</i> (8.2 Kb)     |
|                      | ARS-BFGL-NGS-114697    | 2                | 48,356,704        | 5.50E-06        | G/A     | intron variant          | <i>ORC4</i>                                         |
| Sperm head disorders | HAPMAP40994-BTA-46361  | 19               | 61,630,610        | 5.50E-06        | T/C     | intergenic variant      | <i>MAP2K6</i> (78.4 Kb)                             |
|                      | ARS-BFGL-NGS-113327    | 18               | 12,295,233        | 5.88E-06        | C/T     | intergenic variant      | <i>FOXF1</i> (85.3 Kb)                              |
|                      | ARS-BFGL-NGS-116330    | 2                | 131,016,477       | 5.88E-06        | A/G     | intergenic variant      | <i>ZBTB40</i> (76.4 Kb)                             |
|                      | ARS-BFGL-NGS-3988      | 26               | 41,487,372        | 5.88E-06        | C/A     | intron variant          | <i>PTPRU</i>                                        |
|                      | ARS-BFGL-NGS-57214     | 8                | 7,032,385         | 5.88E-06        | A/G     | intergenic variant      | <i>GLRA3</i> (13.6 Kb)                              |
|                      | ARS-BFGL-NGS-83728     | 11               | 94,227,167        | 5.88E-06        | C/T     | intron variant          | <i>RABGAP1</i>                                      |
|                      | ARS-BFGL-NGS-98094     | 2                | 47,782,292        | 5.88E-06        | C/T     | intergenic variant      | <i>EPC2</i> (132.3 Kb),<br><i>MBD5</i> (18.4 Kb)    |
|                      | ARS-BFGL-NGS-98828     | 9                | 20,117,983        | 5.88E-06        | C/T     | intergenic variant      | <i>BCKDHB</i> (12.3 Kb)                             |

|                       |                            |    |            |              |     |                          |                                                |
|-----------------------|----------------------------|----|------------|--------------|-----|--------------------------|------------------------------------------------|
|                       | BOVINEHD06000<br>06887     | 6  | 25,017,431 | 5.88E-<br>06 | G/T | intron<br>variant        | <i>PPP3CA</i>                                  |
|                       | BOVINEHD15000<br>25946     | 15 | 65,145,149 | 5.88E-<br>06 | G/A | synonymous<br>variant    | <i>CD59</i>                                    |
|                       | BTA-73210-NO-<br>RS        | 5  | 29,544,481 | 5.88E-<br>06 | G/A | intron<br>variant        | <i>DIP2B</i>                                   |
|                       | BTB-00401428               | 9  | 81,924,104 | 5.88E-<br>06 | A/G | intergenic<br>variant    | <i>AIG1</i> (90 Kb),<br><i>ADAT2</i> (16.4 Kb) |
|                       | BTB-00671456               | 17 | 11,751,720 | 5.88E-<br>06 | T/G | 3' UTR<br>variant        | <i>TTC29</i> , <i>POU4F2</i> (71<br>Kb)        |
|                       | BTB-01560502               | 1  | 5,880,498  | 5.88E-<br>06 | G/A | intron<br>variant        | <i>GRIK1</i>                                   |
|                       | HAPMAP38976-<br>BTA-71247  | 10 | 54,582,753 | 5.88E-<br>06 | G/T | intron<br>variant        | <i>NEDD4</i><br>( <i>esv4011968</i> )          |
|                       | HAPMAP41900-<br>BTA-54636  | 22 | 46,309,192 | 5.88E-<br>06 | C/T | intergenic<br>variant    | <i>WNT5A</i> (195.1 Kb)                        |
|                       | HAPMAP45875-<br>BTA-37931  | 10 | 80,331,159 | 5.88E-<br>06 | A/T | intron<br>variant        | <i>RAD51B</i>                                  |
|                       | HAPMAP52726-<br>RS29018162 | 12 | 44,326,840 | 5.88E-<br>06 | G/T | intron<br>variant        | <i>KLHL1</i>                                   |
|                       | HAPMAP54751-<br>RS29013947 | 6  | 19,307,772 | 5.88E-<br>06 | C/T | intergenic<br>variant    | <i>DKK2</i> (73.7 Kb)                          |
|                       | ARS-BFGL-NGS-<br>44351     | 10 | 28,333,105 | 5.33E-<br>06 | T/C | intron<br>variant        | <i>LPCAT4</i>                                  |
| Swollen<br>acrosomes  | ARS-BFGL-NGS-<br>86370     | 3  | 30,756,980 | 6.67E-<br>06 | C/T | upstream<br>gene variant | <i>PPMJ1</i>                                   |
|                       | HAPMAP44656-<br>BTA-67751  | 3  | 45,405,468 | 1.07E-<br>05 | C/T | intergenic<br>variant    | <i>DPYD</i> (127.5 Kb)                         |
|                       | ARS-BFGL-NGS-<br>3160      | 10 | 28,548,872 | 1.97E-<br>05 | T/C | intergenic<br>variant    | <i>CACNB2</i> (27.3 Kb)                        |
|                       | HAPMAP23010-<br>BTA-142347 | 4  | 76,657,995 | 1.76E-<br>07 | T/G | intergenic<br>variant    | <i>IGFBP3</i> (46.4 Kb)                        |
| Wrinkled<br>acrosomes | BTA-97670-NO-<br>RS        | 4  | 71,978,141 | 2.21E-<br>07 | A/G | intergenic<br>variant    | <i>NPY</i> (91 Kb)                             |
|                       | ARS-BFGL-NGS-<br>11190     | 4  | 72,275,120 | 4.81E-<br>06 | T/C | intron<br>variant        | <i>MON2</i>                                    |
|                       | HAPMAP43771-<br>BTA-114609 | 4  | 74,823,667 | 9.12E-<br>06 | C/T | intergenic<br>variant    | <i>STEAP1</i> (13 Kb)                          |

<sup>1</sup> BTA, *Bos taurus* chromosome. <sup>2</sup> Distance from a significant SNP to the respective gene is given in parentheses.
